# Supplementary material for: A Nonrandomized Trial of the Effects of Passive Simulated Jogging on Short-Term Heart Rate Variability in Type 2 Diabetic Subjects
Source: J Diabetes Res. 2023 Apr 11;2023:4454396. doi: 10.1155/2023/4454396 (PMC10113059; doi:10.1155/2023/4454396)
Supplement: Supplementary Materials — ESM_File _S1: CONSORT checklist, study diagram, and tables. This file contains the Consolidated Standards of Reporting Trials (CONSORT) checklist and a study diagram. Table 1S contains a summary of additional study participant demographics, physical activity levels, and hemoglobin A1c. Tables 2S and 3S are the effects of age and gender on the heart rate variability changes induced by the jogging device (JD). Table 4S shows the differences between 7 days of jogging device (JD7) and 7 days after completion of JD (Post-JD) and baseline (BL) for parameters of the HRV for the entire study group. [file 4454396.f1.zip]

Archive with 2 entries (2 files):
- Supplemental Data Files JD on HRV Diabetes 8.24.22 docx.pdf
- Supplemental Material File Narrative 8.27.22.docx
